# Supplementary material for: Fecal leukocyte esterase levels predict endoscopic severity as an alternative biomarker in inflammatory bowel disease
Source: publisher site journal article supplement (doi:10.1515/cclm-2025-0747), 2025-08-30
Supplement: Supplementary file 1 [file j_cclm-2025-0747_suppl_003.docx]

**Figure S1.** The AUROCs for FLE, FC, and CRP for predicting SESCD ≥6 in patients with CD were 0.679, 0.730, and 0.701.

AUROC, area under the receiver operating characteristic. FLE, fecal leukocyte esterase. FC, fecal calprotectin. CRP, C-reactive protein. SESCD, simple endoscopic score for Crohn’s disease. CD, Crohn’s disease.

**Figure S2.** The AUROCs for FLE, FC, and CRP for predicting SESCD ≥5 in patients with CD were 0.651, 0.640, and 0.694.

AUROC, area under the receiver operating characteristic. FLE, fecal leukocyte esterase. FC, fecal calprotectin. CRP, C-reactive protein. SESCD, simple endoscopic score for Crohn’s disease. CD, Crohn’s disease.
